# Supplementary material for: “It makes me feel better… just because they said I had a solid argument:” characterization of student interaction with peer feedback
Source: Royal Society of Chemistry journal article supplement (doi:10.1039/d5rp00118h), 2025-10-09
Supplement: d5rp00118h2.pdf [file d5rp00118h2.pdf]

## Overview of Peer Review Engagement:

### Group One: Peer Review Helps Resolve Uncertainty: Revised Claim

| Student      | Draft One                                                                                                         | Praise & Stylistic                                                                      | Praise & Solution                                                                                                        | Counterargument                                                                               | Vague Criticism                                                                      | Revision                                                                                                                                                              |
|--------------|-------------------------------------------------------------------------------------------------------------------|-----------------------------------------------------------------------------------------|--------------------------------------------------------------------------------------------------------------------------|-----------------------------------------------------------------------------------------------|--------------------------------------------------------------------------------------|-----------------------------------------------------------------------------------------------------------------------------------------------------------------------|
| Pothos       | Struggled with conceptual uncertainty; misinterpreted the rate constants from the browning and flavor loss tables | Increased confidence because PR agreed with them; mentioned wanting to improve response | Increase confidence because PR agreed with them; mentioned wanting to improve response                                   | Decreased confidence because agreed with initial conceptual uncertainty                       | Maintained confidence; felt the PR was too vague to act on                           | Changed their temperature to resolve initial conceptual uncertainty. Relied on Praise & Solution and Counterargument PRs to revise response.                          |
| Bluebell     | Struggled with conceptual uncertainty; misread moisture content figure                                            | Remained unconfident; agreed with PR that they needed to improve response               | Remained unconfident; agreed with student's initial conceptual uncertainty                                               | Decreased confidence because agreed with initial conceptual uncertainty                       | Decreased confidence because felt they needed to improve their explanation more      | Changed their temperature & thickness to resolve initial conceptual uncertainty. Relied on all PR's to revise response.                                               |
| Ivy          | Struggled with epistemic uncertainty; unsure if temperature choice was best for onions                            | Increased confidence because PR agreed with them; mentioned wanting to improve response | Increased confidence because PR agreed with them; mentioned wanting to improve response                                  | Decreased confidence because agreed with initial epistemic uncertainty                        | Decrease in confidence because agreed with initial epistemic uncertainty             | Changed their temperature to resolve their epistemic uncertainty. Relied on all PR's to revise response.                                                              |
| Philodendron | Struggled with epistemic uncertainty; noticed the data conflicted and was unsure how to manage that               | Maintained low confidence because the PR did not help them resolve their uncertainty    | Maintained low confidence because the PR did not help them resolve their uncertainty                                     | Decreased confidence because did not help them resolve initial epistemic uncertainty          | Maintained low confidence because the PR did not help them resolve their uncertainty | Changed their temperature and thickness to better manage their epistemic uncertainty. All PR interactions pushed Philodendron to revise argument.                     |
| Daisy        | Struggled with epistemic uncertainty; noticed data was conflicting and was unsure how to manage that              | Increased confidence because the PR agreed with their initial selection                 | Slight decrease in confidence because the PR had pointed out issues with response; still felt confident in initial claim | Decreased confidence by causing student to reflect on initial uncertainty management strategy | Maintained confidence; felt the PR was too vague to act on                           | Changed temperature to better manage the conflicting data in their response; Relied on Praise/Stylistic, Praise/Solution, and Counterargument PR to improve response. |
| Rose         | Struggled with epistemic uncertainty; unsure what factors, if                                                     | Increased confidence because PR agreed with them; mentioned still                       | Felt less confident because the PR told them they needed to                                                              | Decreased confidence by causing student to                                                    | Maintained confidence; felt the PR was too                                           | Added more reasoning to second draft that added more justification to                                                                                                 |

|              |                                                                                       |                                                                                                     |                                                                                                     |                                                                         |                                                                          |                                                                                                     |
|--------------|---------------------------------------------------------------------------------------|-----------------------------------------------------------------------------------------------------|-----------------------------------------------------------------------------------------------------|-------------------------------------------------------------------------|--------------------------------------------------------------------------|-----------------------------------------------------------------------------------------------------|
|              | any should be prioritized in their response                                           | feeling uncertain about draft one                                                                   | add more explanation to their response                                                              | reflect on initial epistemic uncertainty                                | vague to act on                                                          | uncertainty management strategy from draft one                                                      |
| <b>Lilly</b> | Struggled with conceptual uncertainty; worried about interpretation of rate constants | Increased confidence because PR agreed with them; mentioned still feeling uncertain about draft one | Increased confidence because PR agreed with them; mentioned still feeling uncertain about draft one | Decreased confidence because agreed with initial conceptual uncertainty | Maintained confidence; felt each PR gave something different to consider | Added more explanation about their initial interpretation of the rate constants to improve response |

## Group Two: Peer Review Can Provide Feedback for Improvement

| Student          | Draft One                                                                                          | Praise & Stylistic                                                                  | Praise & Solution                                                                                                                | Counterargument                                                                                                         | Vague Criticism                                                                        | Revision                                                                                                                                               |
|------------------|----------------------------------------------------------------------------------------------------|-------------------------------------------------------------------------------------|----------------------------------------------------------------------------------------------------------------------------------|-------------------------------------------------------------------------------------------------------------------------|----------------------------------------------------------------------------------------|--------------------------------------------------------------------------------------------------------------------------------------------------------|
| <b>Tulip</b>     | Utilized 2 out of 3/middle ground reasoning; acknowledged they could add more evidence to argument | Still confident because the PR agreed with them; agreed with suggestion from the PR | Slightly less confident because felt their response needed improvement; agreed with PR, referenced initial areas for improvement | Slightly less confident because the PR disagreed with their initial draft; felt PR just prioritized something different | Maintained slightly lower confidence; referenced initial areas for improvement         | Added more evidence and reasoning to address suggestions from each peer review                                                                         |
| <b>Azalea</b>    | Utilized prioritized moisture content/middle ground reasoning; felt good about initial draft       | Still confident because the PR agreed with them                                     | Slightly less confident because felt their response needed improvement; agreed with PR                                           | Slightly less confident because the PR disagreed with their initial draft; felt PR just prioritized something different | Maintained slightly lower confidence; felt the PR was too vague to act on              | Added more evidence and reasoning to address suggestions from praise/solution and counterargument PR.                                                  |
| <b>Orchid</b>    | Utilized prioritized moisture content/middle ground reasoning; felt good about initial draft       | Still confident because the PR agreed with them; agreed with suggestion from the PR | Slightly less confident because felt their response needed improvement; agreed with PR                                           | Slightly less confident because the PR disagreed with their initial draft; felt PR just prioritized something different | Maintained slightly lower confidence; felt the PR was too vague to act on              | Added more evidence and reasoning to address suggestions from praise/stylistic, praise/solution, and counterargument PR                                |
| <b>Carnation</b> | Misinterpreted moisture content graph; felt confident in initial draft                             | Still confident because the PR agreed with them; agreed with suggestion from the PR | Slightly less confident because felt their response needed improvement; agreed with PR                                           | Slightly less confident because the PR helped them to identify their initial misinterpretation                          | Slightly less confident because felt their response needed improvement; agreed with PR | Addressed original misinterpretation in response, relied on all PR to improve their response                                                           |
| <b>Laceleaf</b>  | Felt confident with initial draft; utilized variance reasoning                                     | Maintained high confidence; agreed with PR that they could improve their response   | Maintained high confidence; agreed with PR that they could improve their response                                                | Decreased in confidence; countered the PR using variance reasoning                                                      | Maintained confidence; felt the PR was too vague to act on                             | Included more evidence and reasoning to better explain initial variance reasoning; relied on praise/solution and counterargument PR to revise argument |

|                 |                                                                                |                                                                                              |                                                                                      |                                                                          |                                                            |                                                                                                                                                           |
|-----------------|--------------------------------------------------------------------------------|----------------------------------------------------------------------------------------------|--------------------------------------------------------------------------------------|--------------------------------------------------------------------------|------------------------------------------------------------|-----------------------------------------------------------------------------------------------------------------------------------------------------------|
| <b>Fern</b>     | Felt confident with initial draft; utilized variance reasoning                 | Maintained high confidence; didn't think professionalism was important to warrant a revision | Slight decrease in confidence; agreed with PR that they could improve their response | Maintained confidence; countered the PR using variance reasoning         | Maintained confidence; felt the PR was too vague to act on | Included more reasoning in revision that explained why they prioritized the MC more. Relied on praise/solution and counterargument PR to revise argument. |
| <b>Lavender</b> | Felt confident with initial draft; utilized variance reasoning                 | Maintained high confidence; agreed with PR that they could improve their response            | Slight decrease in confidence; agreed with PR that they could improve their response | Slight decrease in confidence; countered the PR using variance reasoning | Maintained confidence; felt the PR was too vague to act on | Added more evidence and reasoning to response. Relied on praise/stylistic, praise/solution, and counterargument PR to revise argument                     |
| <b>Aster</b>    | Felt confident with initial draft; utilized 2 out of 3/Middle ground reasoning | Maintained high confidence because the PR agreed with them                                   | Maintained high confidence; agreed with PR that they could improve their response    | Maintained high confidence; countered the PR using variance reasoning    | Maintained confidence; felt the PR was too vague to act on | Added more evidence and variance reasoning to response. Relied on praise/stylistic, praise/solution, and counterargument PR to revise argument.           |
| <b>Jasmine</b>  | Felt confident with initial draft; utilized middle ground reasoning            | Maintained high confidence; didn't think professionalism was important to warrant a revision | Maintained high confidence; agreed with PR that they could improve their response    | Decrease in confidence; countered the PR using variance reasoning        | Maintained confidence; felt the PR was too vague to act on | Added more evidence and variance reasoning to response. Relied on praise/solution and counterargument PR to revise argument.                              |

### Group Three: Peer Review Provides Confirmation

| <b>Student</b>   | <b>Draft One</b>                                                         | <b>Praise &amp; Stylistic</b>                                                   | <b>Praise &amp; Solution</b>                                                                              | <b>Counterargument</b>                                                           | <b>Vague Criticism</b>                                                           | <b>Revision</b>                                                            |
|------------------|--------------------------------------------------------------------------|---------------------------------------------------------------------------------|-----------------------------------------------------------------------------------------------------------|----------------------------------------------------------------------------------|----------------------------------------------------------------------------------|----------------------------------------------------------------------------|
| <b>Amaryllis</b> | Felt confident with initial draft; utilized compartmentalize reasoning   | Increased confidence because PR agreed with them                                | Increase confidence because PR agreed with them, so their response was correct                            | Maintained high confidence, felt their initial draft was still correct           | Maintained confidence; felt the PR was too vague to act on                       | No revision, felt initial decision was still correct after revisiting data |
| <b>Peony</b>     | Felt confident with initial draft; misinterpreted the rate constant data | Increased confidence because PR agreed with them, so their response was correct | Remained confident because the PR agreed with them; did vaguely mention they could improve their response | Slightly less confident, worried their initial draft was not supported with data | Slightly less confident, worried their initial draft was not supported with data | No revision, felt initial decision was still correct after revisiting data |
| <b>Poppy</b>     | Felt confident with initial draft; utilized middle ground/2 out          | Increased confidence because PR agreed with them, so their response             | Increased confidence because PR agreed with them, so their response                                       | Slightly less confident because the PR disagreed with them,                      | Maintained confident; felt PR came from someone who didn't                       | No revision, felt initial decision was still correct after revisiting data |

|  |                |             |             |                                  |                       |  |
|--|----------------|-------------|-------------|----------------------------------|-----------------------|--|
|  | of 3 reasoning | was correct | was correct | but still felt they were correct | understand assignment |  |
|--|----------------|-------------|-------------|----------------------------------|-----------------------|--|
